# Supplementary material
Source: HighWire-hosted journal article supplement (http://rc.rcjournal.com/highwire/filestream/18495/field_highwire_adjunct_files/0/suppl.pdf)
Supplement: suppl.pdf [file suppl.pdf]

| Reference                                   | Sample                                                        | Inclusion criteria                                                                                                                                                                 | Results of autonomic function: COPD versus CON                                    | Influencing factors (COPD): significant (*) relationship/association exist between;                                                                                                                                                                                                                                                                                                                                                                                   |
|---------------------------------------------|---------------------------------------------------------------|------------------------------------------------------------------------------------------------------------------------------------------------------------------------------------|-----------------------------------------------------------------------------------|-----------------------------------------------------------------------------------------------------------------------------------------------------------------------------------------------------------------------------------------------------------------------------------------------------------------------------------------------------------------------------------------------------------------------------------------------------------------------|
| Antonelli Incalzi et al, 2009 <sup>26</sup> | 54 COPD (46♂, 8♀)69.1±7.7yr<br>95 CON (80♂, 15♀): 68.8±9.0yr  | COPD&CON: diagnosis of COPD according to ATS, undergoing in hospital rehabilitation following non smokers<br>COPD and CON: Randomly assigned                                       |                                                                                   | LF/HFnu* and disease severity, PaCO <sub>2</sub> , FEV <sub>1</sub> , loss of IADL, functional status<br>Circadian rhythm and VLFP, LFnu, HFnu and LF/HFnu*,                                                                                                                                                                                                                                                                                                          |
| Bartels et al, 2012 <sup>11</sup>           | 14 ♀COPD :62±8yr<br>14 ♀CON :59±6yr                           | COPD: COPD, on b agonist medication<br>CON: Healthy, No medication<br>COPD and CON matched: post- menopausal, ex-smokers Nil cardiac disease                                       | BRS ↓<br>(p<0.001)                                                                |                                                                                                                                                                                                                                                                                                                                                                                                                                                                       |
| Bedard et al, 2010 <sup>41</sup>            | 41 COPD: (28♂, 13♀) 67±7yr<br>19 CON: (14♂, 5♀) 68±7yr        | COPD: Clinically stable (GOLD), on medication<br>CON: Healthy<br>COPD and CON matched: Age sex and smoking                                                                         | NN=<br>PNN50=<br>RMSSD =<br>SDANN=<br>SDNN =<br>LF=<br>HF=<br>LF/HF ↓             | LF/HF ratio and FEV <sub>1</sub> * (r=0.342) and Age* (r=0.342)                                                                                                                                                                                                                                                                                                                                                                                                       |
| Barnerdi et al, 2008 <sup>27</sup>          | 15 COPD: (10♂, 5♀)62±8yr<br>28 CON: (13♂, 15♀)59±6yr          | COPD: Mild (GOLD), on medication<br>CON: Healthy<br>COPD and CON matched: , smokers, Non/never-smokers                                                                             | BRS ↓<br>(p<0.001)                                                                |                                                                                                                                                                                                                                                                                                                                                                                                                                                                       |
| Bir et al, 2005 <sup>17</sup>               | 30 COPD: (21♂, 9♀)60.9±9.5yr<br>21 CON: (15♂, 6♀)57.3±7.9yr   | COPD: Mild to severe (GOLD), no medication, ex-smoker<br>CON: Healthy, Non-smokers<br>COPD and CON matched:                                                                        | SSR ↓<br>(p<0.05)                                                                 | SSR* and FEV <sub>1</sub> /FVC and % FEV <sub>1</sub> /FVC                                                                                                                                                                                                                                                                                                                                                                                                            |
| Borghesi-Silva et al, 2008 <sup>39</sup>    | 19♂ COPD69±8yr<br>8 ♂ CON 68±5yr                              | COPD: FEV <sub>1</sub> <50% predicted, no medication, ex-smoker<br>CON: Healthy, Non-smokers<br>COPD and CON matched: Sedentary, Nil other chronic diseases                        | RMSSD ↓<br>SDNN ↓<br>LF ↓<br>HF=<br>LF/HF ↓<br>LFnu ↓<br>HFnu ↑<br>(p<0.05)       |                                                                                                                                                                                                                                                                                                                                                                                                                                                                       |
| Cammilo et al, 2008 <sup>1</sup>            | 31 COPD(16♂, 15♀)66±8yr                                       | COPD: COPD(GOLD), no medication                                                                                                                                                    |                                                                                   | SDNN* and ADL, total daily energy expenditure, BMI, FFM, triceps and quadriceps muscle force, daily expenditure and number of steps >3METs, time spent in ADL >3METs and LCADL.<br>SDNN index* and energy expenditure<br>LF/HF ratio* and total daily expenditure, FFM, triceps and quadriceps muscle force<br>R-R interval*time spent walking and standing, BMI, QOL<br>No relationship between PFT, Fat mass and HRV<br>No relationship between QOL and SDNN, LF/HF |
| Cammilo et al, 2011 <sup>2</sup>            | 40 COPD (21♂, 19♀)<br>COPD:67±7yr<br>CON: 65±10yr             | COPD: GOLD 2-3,<br>CON: GOLD 2-3,<br>COPD and CON matched: regular PA, no unstable cardiac dx, no comorbidity, randomly assigned                                                   |                                                                                   | Time spent walking and HRV*<br>Biceps and triceps muscle force and SDNN*<br>No relationship between QOL and HRV<br>No relationship between smoking status and RMSSD<br>Dyspnea and RMSSD*                                                                                                                                                                                                                                                                             |
| Carvalho et al, 2011 <sup>3</sup>           | 15 COPD(9♂, 6♀)73.9±6.6yr:<br>15CON(8♂, 7♀) 68.7±7.3yr        | COPD: Diagnosis of COPD (GOLD), excluded smokers, recent exacerbation, no medication<br>CON: Healthy (normal lung function)<br>COPD and CON matched:                               | RMSSD ↓<br>SDNN ↓<br>LF ↓<br>HF ↓<br>(p<0.05)                                     |                                                                                                                                                                                                                                                                                                                                                                                                                                                                       |
| Chang et al, 2011 <sup>28</sup>             | 9 COPD(not stated)                                            | COPD: GOLD 2-3 Bronchodilators stop before testing, excluded unstable cardiac /musculoskeletal dx and patients on active phase pulmonary rehab                                     |                                                                                   | Respiratory rate and LF and HF*<br>Ventilatory effort and LF and HF*                                                                                                                                                                                                                                                                                                                                                                                                  |
| Chen, Chen & Kuo et al, 2006 <sup>34</sup>  | 30 COPD: (25♂, 5♀) 69.6±8.5yr<br>18 CON: (15♂, 3♀) 64.6±9.0yr | COPD: Moderate to severe (GOLD)<br>Bronchodilators stop before testing<br>CON: Healthy<br>Excluded those with unstable cardiac COPD and CON matched: Age                           | SDRR ↓<br>CVRR ↓<br>TP ↓<br>LF ↓<br>HF ↓<br>LF/HF=<br>LFnu=<br>HFnu=<br>(p<0.001) | No relationship between FEV <sub>1</sub> % Predicted and FEV <sub>1</sub> /FVC ratio vs HFnu and LF/HF ratio<br>PaO <sub>2</sub> and LF, HF and LF/HF*                                                                                                                                                                                                                                                                                                                |
| Chhabra & De, 2005 <sup>37</sup>            | 56♂COPD57.96±9.8 1yr<br>11♂ CON: 50.82±9.82yr                 | COPD: diagnosis of COPD by BTS, history of >20 pack-years of cigarette smoking, no recent exacerbation, no metabolic dx<br>CON: Healthy, non- smokers<br>COPD and CON: Age matched | Valsalva ratio ↓<br>(p<0.01)<br>ΔIE: ↓<br>(p<0.05)<br>30:15 ratio ↓<br>(p<0.05)   | Disease severity and% FEV <sub>1</sub> *<br>PaO <sub>2</sub> and valsalva ratio and 30:15 ratio*<br>No relationship between PaO <sub>2</sub> and PaCO <sub>2</sub> and HRV<br>TLCO <sub>2</sub> and 30:15 ratio*<br>MPAP and valsalva ratio*                                                                                                                                                                                                                          |
| Costes et al, 2004 <sup>10</sup>            | 21 COPD: (♂, ♀) 62±9yr<br>18<br>CON: (♂, ♀)                   | COPD: GOLD 1-2, on medication<br>CON: Healthy<br>COPD and CON matched: , Age,                                                                                                      | BRS ↓<br>(p<0.05)<br>LF=<br>HF=                                                   | No relationship between FEV <sub>1</sub> , % FEV <sub>1</sub> , FVC, %FVC, RV, FEV <sub>1</sub> /FVC, PaO <sub>2</sub> with BRS                                                                                                                                                                                                                                                                                                                                       |

|                                                           |                                                                                                                                                 |                                                                                                                                                                                                                                                                          |                                                                                                                      |                                                                                                                                                                                                                                                                                |
|-----------------------------------------------------------|-------------------------------------------------------------------------------------------------------------------------------------------------|--------------------------------------------------------------------------------------------------------------------------------------------------------------------------------------------------------------------------------------------------------------------------|----------------------------------------------------------------------------------------------------------------------|--------------------------------------------------------------------------------------------------------------------------------------------------------------------------------------------------------------------------------------------------------------------------------|
|                                                           | 66±1yr                                                                                                                                          |                                                                                                                                                                                                                                                                          | LFnu=<br>HFnu=<br>(p>0.05)                                                                                           |                                                                                                                                                                                                                                                                                |
| Dias de<br>Carvalho et al,<br>2011 <sup>13</sup>          | 17 COPD(10♂,<br>7♀)73.1±5.6yr<br>17 CON: (8♂, 9♀):<br>68.8±8.6yr                                                                                | COPD: diagnosis of COPD by LF (GOLD 2-3),<br>excluded smokers, recent exacerbation, no<br>medication/metabolic dx<br>CON: Healthy (normal LF)<br>COPD and CON: matched                                                                                                   | SD1 ↓<br>SD2 ↓<br>TINN ↓<br>RRTri ↓<br>(p<0.05)                                                                      |                                                                                                                                                                                                                                                                                |
| Fatouleh,<br>Vaughan<br>&Macefield,<br>2011 <sup>32</sup> | 15 COPD: (8♂,<br>7♀)71±2yr<br>12 CON <sub>1</sub> : (8♂,<br>4♀)29±2yr<br>13 HTN: (10♂,<br>3♀)53±2yr<br>10 CON <sub>2</sub> : (5♂, 5♀)<br>50±3yr | COPD: diagnosis of COPD, on medication<br>12 CON <sub>1</sub> : Healthy<br>13 HTN: on their regular<br>medication<br>10 CON <sub>2</sub> : Healthy                                                                                                                       | MSNA ↑<br>(both burst<br>frequencies and burst<br>incidence)<br>p<0.05                                               |                                                                                                                                                                                                                                                                                |
| Gunduz et al,<br>2011 <sup>35</sup>                       | 25 COPD: (22♂,<br>3♀)63±7yr<br>25 CON: (19♂, 6♀)<br>60±8yr                                                                                      | COPD: stable, ambulatory, GOLD 2-3<br>CON: Healthy<br>COPD and CON matched: AGE                                                                                                                                                                                          | sNN50 ↓ (p<0.05)<br>pNN50 ↓ (p<0.05)<br>SDNN ↓ (p<0.001)<br>SDNNi ↓ (p<0.01)<br>SDANN ↓ (p<0.01)<br>RMSSD ↓ (p<0.01) |                                                                                                                                                                                                                                                                                |
| Haidar et al,<br>2009 <sup>19</sup>                       | 18 COPD(10♂, 8♀)<br>51.7±2.4yr<br>14 CON: (5♂, 9♀):<br>47.7±2.8yr                                                                               | COPD: GOLD 1-2, no medication, ex-smoker<br>Placebo: GOLD 1-2, no medication, ex-smoker<br>CON: Healthy, Non-smokers<br>COPD, Placebo and CON matched: Age                                                                                                               | BRS ↓<br>(p<0.025)<br>RRi ↓<br>(p<0.05)                                                                              | FEV <sub>1</sub> and FEV <sub>1</sub> /FVC and BRS*<br>FEV <sub>1</sub> and FEV <sub>1</sub> /FVC and R-R interval*                                                                                                                                                            |
| Lewis,<br>Annadale &<br>Lewis, 2009 <sup>7</sup>          | 10 COPD: (7♂,<br>3♀)73.9±7.2yr                                                                                                                  | COPD: STAGE 3-4 (GOLD), Excluded patients<br>on beta blockers and other drugs affecting ANS                                                                                                                                                                              |                                                                                                                      | Circadian rhythm (morning time)vs HRV (QT multi-fractality, R-R &<br>QTV index)*                                                                                                                                                                                               |
| Ramos et al,<br>2009 <sup>29</sup>                        | 16 COPD(12♂,4♀):<br>64±11yr                                                                                                                     | COPD: COPD(GOLD 1-3), mean FEV <sub>1</sub> 60±25%<br>of predicted, no medication, no ANS associated<br>diseases                                                                                                                                                         |                                                                                                                      | No correlation was found between severity and RMSSD                                                                                                                                                                                                                            |
| Raupach et al,<br>2008 <sup>31</sup>                      | 15 COPD(11♂, 4♀)<br>60.9±1.4yr<br>15 CON:(11♂, 4♀)<br>60.7±1.4yr                                                                                | COPD: FEV <sub>1</sub> ≤60% predicted (GOLD), no<br>diuretic medication Between 30-80 years<br>CON: Healthy<br>COPD and CON matched: Nonsmoking, age,<br>weight & sex                                                                                                    | BRS ↓ (p=0.009)<br>MSNA ↑ (p<0.001)                                                                                  | Respiratory rate and BRS * and MSNA*                                                                                                                                                                                                                                           |
| Raupach et al,<br>2011 <sup>33</sup>                      | 15 COPD(11♂, 4♀)<br>60.9±1.4yr<br>15 CON:(11♂, 4♀)<br>60.7±1.4yr                                                                                | COPD: FEV <sub>1</sub> ≤60% predicted (GOLD), no<br>diuretic medication Between 30-80 years<br>CON: Healthy<br>COPD and CON matched:<br>Nonsmoking, age, weight & sex                                                                                                    | MSNA↑ (burst<br>incidence)<br>(p<0.013)                                                                              |                                                                                                                                                                                                                                                                                |
| Reis et al,<br>2010 <sup>36</sup>                         | 10 ♂ COPD69±9yr<br>9 ♂ CON:64±5yr                                                                                                               | COPD: FEV <sub>1</sub> ≤60% predicted (GOLD),<br>FEV/FVC <0.7 stable clinically, on normal<br>medication, nonsmoker<br>CON: Healthy, no cardiac & metabolic dx<br>COPD and CON matched: LFT, FC                                                                          | LF↓<br>HF=<br>SDNN=<br>RMSSD=<br>(p<0.05)                                                                            | MIP and ΔIE *                                                                                                                                                                                                                                                                  |
| Reis et al,<br>2010 <sup>38</sup>                         | 10 ♂ COPD: 69±9yr<br>9 ♂ CON:64±5yr                                                                                                             | COPD: FEV <sub>1</sub> ≤60% predicted (GOLD),<br>FEV/FVC <0.7 stable clinically, on normal<br>medication, nonsmoker<br>CON: Healthy, no cardiac & metabolic dx<br>COPD and CON matched: LFT, FC                                                                          | RRi =<br>SDNN ↓<br>RMSSD ↓<br>LF ↓<br>HF ↓<br>LFnu=<br>HFnu=<br>LF/HF =<br>(p<0.05)                                  |                                                                                                                                                                                                                                                                                |
| Sin et al,<br>2007 <sup>46</sup>                          | 21COPD(10♂,11♀)<br>COPD:64.1±9.7yr<br>CON: 66.6±10.6yr                                                                                          | COPD and CON: clinical diagnosis of COPD,≥10<br>pack/yr smoking history, FEV <sub>1</sub> <70% predicted,<br>excluded cardiac dx coexisting disorder, cognitive<br>impairment, poor prognosis                                                                            |                                                                                                                      | Circadian rhythm (Night time)and SDNN* and SDANN*                                                                                                                                                                                                                              |
| Suh et al 2013 <sup>6</sup>                               | 30 COPD(15♂, 15♀)<br>59.1±11.2yr<br>30 CON (15♂, 15♀)<br>59.2±11.3yr                                                                            | COPD: FEV <sub>1</sub> ≤60% predicted (GOLD), FEV/FVC<br><0.7 anxious and non-anxious<br>CON: Healthy, anxious and non-anxious<br>COPD and CON matched: Age, sex                                                                                                         |                                                                                                                      | Anxiety and SDNN and HF*                                                                                                                                                                                                                                                       |
| Tug et al<br>2005 <sup>45</sup>                           | 35 COPD(15♂, 15♀)<br>65.2±7.29yr<br>15♂CON<br>56.24±7.69yr                                                                                      | COPD: According to GOLD criteria, excluded<br>those on drugs affecting the ANS, other chronic<br>comorbidities<br>CON: Healthy,<br>COPD and CON matched: Age                                                                                                             |                                                                                                                      | No correlation was found between severity age, smoking status, PaO <sub>2</sub><br>, SaO <sub>2</sub> age of illness and SSR (p>0.05)<br>No correlation was found between severity age, smoking status, PaO <sub>2</sub><br>, SaO <sub>2</sub> age of illness and RRi (p>0.05) |
| van Gestel et<br>al, 2011 <sup>3</sup>                    | 60COPD<br>(23♂,37♀)65.2±7.7y<br>r                                                                                                               | COPD: diagnosed GOLD I-IV, clinically stable,<br>40-75years, FEV <sub>1</sub> <80% predicted, normal BMI ,<br>excluded; CVD dx cancer, other respiratory dx,<br>history of lung surgery, unable to ambulate,<br>receiving corticosteroids other vasoactive<br>medication |                                                                                                                      | HRQOL and RMSSD, HF, LF/HF ratio*                                                                                                                                                                                                                                              |
| van Gestel et<br>al, 2012 <sup>8</sup>                    | 154 COPD<br>(67♂,87♀)<br>62.5±10.7yr                                                                                                            | COPD: diagnosed based on GOLD guidelines.<br>clinically stable, 40-75years, patients on long term<br>corticosteroids or morphine medications, mental<br>or physical disability, acute or recent exacerbation                                                             |                                                                                                                      | Exercise capacity (6MWT) and physical activity with HRV<br>(NNmean)*                                                                                                                                                                                                           |

|                                    |                                                   |                                                                                                                                                                                               |                                                          |                                                                                         |
|------------------------------------|---------------------------------------------------|-----------------------------------------------------------------------------------------------------------------------------------------------------------------------------------------------|----------------------------------------------------------|-----------------------------------------------------------------------------------------|
|                                    |                                                   | (6 weeks).                                                                                                                                                                                    |                                                          |                                                                                         |
| Yazici et al, 2007 <sup>30</sup>   | 28COPD(♂,♀)<br>64±10yr                            | COPD: clinical diagnosis COPD (ATS/ERS) with HRF and excluded those with cardiovascular diseases, diabetes, disease, hemodynamic instability, systemic disorders that can affect ANS          |                                                          | No significant relationship between PaO <sub>2</sub> , PH and PaCO <sub>2</sub> and HRV |
| Zamarron et al, 2014 <sup>40</sup> | 23 ♂ COPD<br>69.6±7.3yr<br>8 ♂ CON:<br>68.6±4.9yr | COPD: According to GOLD criteria, BMI: 28.7±5.4kg/m <sup>2</sup> , treated with b-agonists and anti cholinergics, sever but stable condition,<br>CON: Healthy, BMI: 28.2±3.8kg/m <sup>2</sup> | HF ↑<br>LF ↑<br>LF/HF ratio =<br>TP=<br>(p<0.05; p<0.01) | HRV(POW) and peak flow *<br>Acute exacerbations and LF, HF and POW *.                   |

**Table 1:** Evidence table of included studies

**KEY:** COPD: chronic obstructive pulmonary disease, CON: control, \*: significant relationship, ↓: significantly lower in COPD, ↑: significantly higher in COPD, =: no significant difference; p: alpha probability level, ♂: male, ♀: female, vs: versus, GOLD: Global initiative for obstructive lung disease, LF: lung function, FEV<sub>1</sub>: forced expiratory volume in one second, FVC: forced vital capacity, MET: metabolic equivalence, BRS: baro receptor sensitivity, MSNA muscle sympathetic nerve activity, SSR: sympathetic skin response, HRV: heart rate variability, RMSSD: square root of the mean of the sum of the squares of differences, RRi: RR waves interval, SDANN: standard deviation of the averages of NN intervals in all 5-minute segments of the entire recording, SDNN: standard deviations of all NN intervals, sNN50: total number of differences between adjacent RR intervals that were greater than 50ms, 30:15 ratio: the ratio between the shortest R-R interval around the 15th beat and longest R-R interval around the 30th beat, I-E difference/ ΔIE: difference of heart rate during inspiration and expiration, RRtri: variability triangular index, TINN: triangular interpolation of RR interval, SD1: standard deviation of instantaneous beat-to-beat variability, SD2: standard deviation in long term of the RR interval, SDRR: standard deviation of RR interval, CVRR: coefficient of variation of RR interval, TP: total power, HF: high frequency, VLF: very low frequency, LF: low frequency LF/HF: low-high frequency ratio. ADL: activity of daily living, nu: normalized, ab: absolute, ATS: Ameican thoracic society, TP: total HRV power.

Table 2: Table of evidence synthesis

| S/ No | Author and year                                  | 1        | 2        | 3        | 4        | 5        | 6        | 7        | Total (P-C) |          |               |            | Meth. Qual. (%) | Evid. grade |
|-------|--------------------------------------------------|----------|----------|----------|----------|----------|----------|----------|-------------|----------|---------------|------------|-----------------|-------------|
| 1     | Bartels et al, 2012 <sup>11</sup>                | +        | +        | +        | +        | -        | +        | +        | 6/7         |          |               |            | 86              | B           |
| 2     | Bedard et al, 2010 <sup>41</sup>                 | +        | +        | +        | +        | -        | +        | +        | 6/7         |          |               |            | 86              | B           |
| 3     | Bernadi et al, 2008 <sup>27</sup>                | +        | +        | -        | +        | -        | -        | +        | 4/7         |          |               |            | 57              | B           |
| 4     | Bir et al, 2005 <sup>17</sup>                    | +        | +        | +        | +        | -        | +        | +        | 6/7         |          |               |            | 86              | B           |
| 5     | Borghi-Silva et al, 2008 <sup>39</sup>           | +        | +        | +        | +        | -        | +        | +        | 6/7         |          |               |            | 86              | B           |
| 6     | Carvalho et al, 2011 <sup>3</sup>                | +        | +        | -        | +        | -        | +        | +        | 5/7         |          |               |            | 71              | B           |
| 7     | Chen, Chen &Kuo, 2006 <sup>34</sup>              | +        | +        | -        | +        | -        | +        | +        | 5/7         |          |               |            | 71              | B           |
| 8     | Chhabra& De, 2005 <sup>37</sup>                  | +        | +        | -        | +        | -        | +        | +        | 5/7         |          |               |            | 71              | B           |
| 9     | Costes et al, 2004 <sup>10</sup>                 | +        | +        | -        | +        | -        | -        | +        | 4/7         |          |               |            | 57              | B           |
| 10    | Dias de Carvalho et al, 2011 <sup>13</sup>       | +        | +        | +        | +        | -        | +        | +        | 6/7         |          |               |            | 86              | B           |
| 11    | Fatouleh, Vaughan &Macefield, 2011 <sup>32</sup> | +        | +        | -        | +        | -        | +        | +        | 5/7         |          |               |            | 71              | B           |
| 12    | Gunduz et al, 2009 <sup>35</sup>                 | +        | +        | -        | +        | -        | +        | +        | 5/7         |          |               |            | 71              | B           |
| 13    | Raupach et al, 2008 <sup>31</sup>                | +        | +        | +        | +        | -        | +        | +        | 6/7         |          |               |            | 86              | B           |
| 14    | Raupach et al, 2010 <sup>33</sup>                | +        | +        | +        | +        | -        | +        | +        | 6/7         |          |               |            | 86              | B           |
| 15    | Reis et al, 2010 <sup>36</sup>                   | +        | +        | -        | +        | -        | +        | +        | 5/7         |          |               |            | 71              | B           |
| 16    | Reis et al, 2010 <sup>38</sup>                   | +        | +        | -        | +        | -        | +        | +        | 5/7         |          |               |            | 71              | B           |
| 17    | Suh et al, 2013 <sup>6</sup>                     | +        | +        | +        | +        | -        | +        | +        | 6/7         |          |               |            | 86              | B           |
| 18    | Tug, Terzi &Yoldas 2005 <sup>45</sup>            | +        | +        | +        | +        | -        | +        | +        | 6/7         |          |               |            | 86              | B           |
| 19    | van Gestel et al, 2012 <sup>8</sup>              | +        | +        | +        | +        | -        | +        | +        | 6/7         |          |               |            | 86              | B           |
| 20    | Zamarron et al 2014 <sup>40</sup>                | +        | +        | +        | +        | -        | +        | +        | 6/7         |          |               |            | 86              | B           |
|       | <b>Author and year</b>                           | <b>1</b> | <b>2</b> | <b>3</b> | <b>4</b> | <b>5</b> | <b>6</b> | <b>7</b> | <b>8</b>    | <b>9</b> | <b>Cohort</b> |            |                 |             |
| 21    | Camillo et al, 2008 <sup>1</sup>                 | +        | +        | +        | +        | -        | +        | -        | +           | +        | 7/9           |            | 78              | B           |
| 22    | Camillo et al, 2011 <sup>2</sup>                 | +        | +        | +        | +        | -        | +        | +        | -           | +        | 7/9           |            | 78              | B           |
| 23    | Chang et al, 2011 <sup>28</sup>                  | +        | -        | +        | +        | -        | +        | -        | -           | +        | 5/9           |            | 56              | B           |
| 24    | Lewis, Annandale and Lewis, 2009 <sup>4</sup>    | +        | +        | -        | +        | -        | +        | -        | +           | +        | 6/9           |            | 67              | B           |
| 25    | Ramos et al, 2009 <sup>29</sup>                  | -        | -        | +        | +        | -        | +        | -        | -           | +        | 4/9           |            | 45              | B           |
| 26    | van Gestel et al, 2011 <sup>5</sup>              | +        | +        | +        | +        | -        | +        | -        | -           | +        | 6/9           |            | 67              | B           |
| 27    | Yazici et al, 2007 <sup>30</sup>                 | +        | +        | +        | +        | -        | +        | -        | +           | +        | 5/9           |            | 56              |             |
|       | <b>Author and year</b>                           | <b>1</b> | <b>2</b> | <b>3</b> | <b>4</b> | <b>5</b> | <b>6</b> | <b>7</b> | <b>8</b>    | <b>9</b> | <b>10</b>     | <b>RCT</b> |                 |             |
| 28    | Antonelli Incalzi et al, 2009 <sup>26</sup>      | +        | -        | -        | -        | -        | +        | +        | +           | -        | -             | 4/10       | 40              | A2          |
| 29    | Haidar et al 2009 <sup>19</sup>                  | +        | +        | +        | +        | -        | +        | +        | +           | -        | +             | 8/10       | 80              | A2          |
| 30    | Sin et al, 2007 <sup>46</sup>                    | +        | +        | -        | +        | -        | +        | +        | +           | +        | +             | 8/10       | 80              | A2          |

**KEY:** + : Agree and - : disagree, **For patient controlled studies**, 1: clear description of the patient group, 2: clear description of the control group, 3: well defined in/exclusion criteria, 4:clearly defined and appropriate intervention, 5 blinding, 6 identification of confounders in the design and analysis and 7: whether we considered the results valid and applicable. **For cohort studies**, 1:description of the patient groups, 2:selection bias excluded, 3: description of exposure and adequate evaluation, 4: description of outcome and adequate evaluation, 5:blinding, 6: Sufficiently long follow up (including drop-outs and loss on follow-up), 7:selective loss to follow up sufficiently excluded, 8: identification of confounders and 9: whether we considered the results valid and applicable. **While for RCTs**, 1: randomization, blinding of randomization, 3: patients blinded to treatment, 4: health care professionals blinded to treatment 5 Outcome assessors blinded to treatment, 6: groups comparable at baseline, 7 sufficient amount of the patients were available at follow up, 8 intention to treat analysis, 9: Comparability of treatment and 10: whether we considered the results valid and applicable.
